# Supplementary material for: The International Heart Transplant Survival Algorithm (IHTSA): A New Model to Improve Organ Sharing and Survival
Source: PubMed Central journal article supplement (PMC4356583; doi:10.1371/journal.pone.0118644), 2015-03-11
Supplement: pone.0118644.s002.pdf [file pone.0118644.s002.pdf]

**S1A Table. Recipient demographic and clinical characteristics of the study population from ISHLT and the Nordic Thoracic Transplantation database.**

|                                          | N      | ISHLT                           |                  | NTTD             |           |
|------------------------------------------|--------|---------------------------------|------------------|------------------|-----------|
|                                          |        | Derivation cohort<br>N = 41,780 | IVC<br>N = 8,569 | TVC<br>N = 6,276 | N = 1,285 |
| Recipient's diagnosis                    | 57,863 |                                 |                  |                  |           |
| Ischemic cardiomyopathy                  |        | 17,670 (42%)                    | 3,630 (42%)      | 2,166 (35%)      | 450 (36%) |
| Non-ischemic cardiomyopathy              |        | 19,265 (46%)                    | 3,946 (46%)      | 3,213 (51%)      | 613 (50%) |
| Congenital                               |        | 867 (2%)                        | 180 (2%)         | 203 (3%)         | 49 (4%)   |
| Graft failure                            |        | 846 (2%)                        | 168 (2%)         | 151 (2%)         | 5 (0%)    |
| Valvular heart disease                   |        | 1,254 (3%)                      | 266 (3%)         | 130 (2%)         | 38 (3%)   |
| Miscellaneous                            |        | 1,878 (4%)                      | 379 (4%)         | 413 (7%)         | 83 (7%)   |
| Age (year)                               | 57,910 | 51±12                           | 51±12            | 51±13            | 50±11     |
| Female gender                            | 57,910 | 8,463 (20%)                     | 1,827 (21%)      | 1,485 (24%)      | 286 (22%) |
| Height (cm)                              | 45,100 | 173±9.4                         | 173±9.5          | 174±9.6          | 175±8.6   |
| Weight (kg)                              | 45,464 | 78±16                           | 78±16            | 81±17            | 77±14     |
| History of cigarette use                 | 15,299 | 3,604 (42%)                     | 760 (41%)        | 1,896 (46%)      | 83 (12%)  |
| COPD                                     | 31,135 | 789 (3%)                        | 142 (3%)         | 138 (4%)         | 36 (5%)   |
| Diabetes                                 | 33,471 | 4,802 (20%)                     | 1,006 (21%)      | 1,059 (25%)      | 82 (11%)  |
| History of peptic ulcer                  | 32,833 | 1,102 (5%)                      | 221 (4%)         | 75 (2%)          | 30 (4%)   |
| Hypertension*                            | 33,613 | 9,185 (38%)                     | 1,904 (38%)      | 1,526 (44%)      | 141 (19%) |
| Peripheral vascular disease              | 33,535 | 833 (3%)                        | 182 (4%)         | 102 (3%)         | 20 (3%)   |
| History of cerebrovascular disease       | 32,387 | 916 (4%)                        | 197 (4%)         | 171 (4%)         |           |
| Cerebrovascular event                    | 30,080 | 550 (3%)                        | 127 (3%)         | 103 (3%)         | 45 (6%)   |
| Dialysis pre-transplant                  | 34,908 | 322 (1%)                        | 77 (1%)          | 89 (2%)          | 15 (2%)   |
| Infection within two weeks <sup>†</sup>  | 32,624 | 2,326 (10%)                     | 493 (10%)        | 410 (10%)        | 40 (5%)   |
| Cytomegalovirus status                   | 20,776 | 10,019 (74%)                    | 2,106 (74%)      | 2,291 (71%)      | 778 (67%) |
| Antiarrhythmic drugs prior to transplant | 31,660 | 8,472 (37%)                     | 1,755 (37%)      | 1,255 (39%)      | 263 (36%) |
| Amiodarone prior to transplant           | 31,114 | 5,787 (26%)                     | 1,223 (26%)      | 993 (32%)        | 172 (23%) |
| Implantable defibrillator                | 28,675 | 9,142 (44%)                     | 1,934 (45%)      | 2,921 (93%)      | 182 (24%) |
| Unstable angina                          | 23,133 | 2,336 (14%)                     | 503 (15%)        | 69 (3%)          | 70 (9%)   |
| PRA > 10%                                | 31,590 | 1,841 (8%)                      | 370 (8%)         | 402 (11%)        | 87 (7%)   |
| Previous blood transfusion               | 19,138 | 7,574 (51%)                     | 1,569 (51%)      | 966 (86%)        |           |
| Previous transplanted <sup>#</sup>       | 54,001 | 1,160 (3%)                      | 224 (3%)         | 200 (3%)         | 5 (0%)    |
| Previous cardiac surgery                 | 34,004 | 6,594 (28%)                     | 1,371 (28%)      | 2,465 (60%)      | 305 (24%) |
| Malignancy prior to transplantation      | 36,176 | 1,014 (4%)                      | 221 (4%)         | 310 (7%)         |           |
| Oxygen consumption at exercise           | 7,216  | 11.8±3.1                        | 11.7±3.2         | 11.9±3.2         |           |
| Activities of daily living               | 10,184 |                                 |                  |                  |           |
| No assistance                            |        | 2,319 (28%)                     | 488 (29%)        | 58 (20%)         |           |
| Some assistance                          |        | 4,528 (55%)                     | 887 (53%)        | 132 (46%)        |           |
| Total assistance                         |        | 670 (8%)                        | 164 (10%)        | 42 (15%)         |           |
| Working for income                       | 12,639 | 414 (6%)                        | 82 (5%)          | 232 (6%)         |           |

Data are mean (SD), number (%). The numbers are calculated on patients with available data. \*Drug treated systemic hypertension. <sup>†</sup>Infection requiring intra venous antibiotic therapy within two weeks prior to transplant. <sup>#</sup>Previous transplant — previous kidney, liver, pancreas, pancreas islet cells, heart, lung, intestine and/or bone marrow transplant. COPD, chronic obstructive pulmonary disease; ISHLT, International Society for Heart and Lung Transplantation; IVC, internal validation cohort; NTTD, Nordic Thoracic Transplantation Database; PRA, panel reactive antibody; TVC, temporal validation cohort.

**S1B Table. Recipient hemodynamic, laboratory and urgency characteristics of the study population from ISHLT and the Nordic Thoracic Transplantation Database.**

|                                       | N      | ISHLT                           |                  |                  | NTD       |
|---------------------------------------|--------|---------------------------------|------------------|------------------|-----------|
|                                       |        | Derivation cohort<br>N = 41,780 | IVC<br>N = 8,569 | TVC<br>N = 6,276 | N = 1,285 |
| PVR (wood units)                      | 27,053 | 2.6±1.9                         | 2.6±2.1          | 2.5±1.6          | 3.0±1.8   |
| SPP (mmHg)                            | 31,226 | 44±15                           | 44±16            | 43±15            |           |
| Creatinine (µmol/l)                   | 34,017 | 120± 64                         | 120±67           | 117±66           | 111±59    |
| Serum bilirubin (mg/dl)               | 31,020 | 1.43±3.54                       | 1.29±2.37        | 1.20±2.05        | 1.31±0.91 |
| Serum albumin (g/l)                   | 17,583 | 36.5± 7.7                       | 36.5± 7.5        | 36.7±7.0         |           |
| Medical condition at transplant       | 35,172 |                                 |                  |                  |           |
| Not hospitalized                      |        | 11,374 (45%)                    | 2,338 (45%)      | 2,308 (57%)      | 590 (76%) |
| Hospitalized                          |        | 4,106 (16%)                     | 887 (17%)        | 669 (17%)        | 92 (12%)  |
| ICU                                   |        | 9,679 (38%)                     | 1,989 (38%)      | 1,043 (26%)      | 97 (12%)  |
| Inotropic support prior to transplant | 34,271 | 12,136 (49%)                    | 2,627 (51%)      | 1,561 (38%)      |           |
| Mechanical ventilation                | 32,712 | 731 (3%)                        | 151 (3%)         | 138 (3%)         |           |
| Intra-aortic balloon pump             | 33,460 | 2,160 (9%)                      | 456 (9%)         | 332 (8%)         |           |
| ECMO                                  | 32,836 | 106 (0%)                        | 23 (0%)          | 39 (1%)          |           |
| Ventricular assist device             | 24,509 | 4,367 (26%)                     | 902 (26%)        | 1,429 (34%)      |           |

Data are mean (SD) or number (%). The numbers are calculated on patients with available data. ECMO, extracorporeal membrane oxygenation; ICU, intensive care unit; ISHLT, International Society for Heart and Lung Transplantation; IVC, internal validation cohort; NNTD, Nordic Thoracic Transplantation Database; PVR, pulmonary vascular resistance; SPP, systolic pulmonary pressure; TVC, temporal validation cohort.

**SIC Table. Donor demographic and characteristics of the study population from ISHLT and the Nordic Thoracic Transplantation Database.**

|                         | N      | ISHLT                           |                  |                  | NTTD      |
|-------------------------|--------|---------------------------------|------------------|------------------|-----------|
|                         |        | Derivation cohort<br>N = 41,780 | IVC<br>N = 8,569 | TVC<br>N = 6,276 | N = 1,285 |
| Age (year)              | 57,910 | 34±13                           | 34±13            | 35±13            | 39±13     |
| Female gender           | 57,910 | 13,011 (31%)                    | 2,657 (31%)      | 1,981 (32%)      | 451 (35%) |
| Height (cm)             | 48,782 | 174.8±9.4                       | 174.8± 9.3       | 174.7±9.4        | 176.7±8.6 |
| Weight (kg)             | 50,097 | 78±16                           | 78±17            | 81±18            | 78±14     |
| History of smoking      | 31,920 | 7,544 (33%)                     | 1,507 (32%)      | 725 (18%)        | 94 (20%)  |
| History of alcohol use  | 12,832 | 1,114 (15%)                     | 241 (16%)        | 618 (15%)        |           |
| History of cocaine use  | 32,141 | 1,810 (8%)                      | 404 (8%)         | 566 (14%)        |           |
| History of diabetes     | 35,528 | 496 (2%)                        | 99 (2%)          | 144 (3%)         | 7 (2%)    |
| History of hypertension | 35,420 | 3,012 (12%)                     | 598 (11%)        | 6,15 (15%)       | 33 (7%)   |
| LVEF (%)                | 20,235 | 61.5±7.9                        | 61.5±7.8         | 61.6±7.1         |           |
| Cytomegalovirus status  | 35,913 | 15,188 (60%)                    | 3,138 (60%)      | 2,489 (62%)      | 778 (67%) |
| Creatinine (µmol/l)     | 31,558 | 105±84                          | 106±82           | 115±98           |           |
| BUN (mg/dl)             | 31,262 | 14±11                           | 15±12            | 17±14            |           |
| Serum bilirubin (mg/dL) | 31,077 | 1.24±1.94                       | 1.23±1.69        | 1.48±2.64        |           |
| Ischemic time (minutes) | 36,276 | 186±65                          | 186±65           | 197± 66          | 172± 66   |
| Cause of donor death    | 47,785 |                                 |                  |                  |           |
| Head trauma             |        | 17,497 (51%)                    | 3,673 (53%)      | 2,2330 (44%)     | 285 (22%) |
| Cerebrovascular event   |        | 10,482 (31%)                    | 2,2064 (30%)     | 1,400 (26%)      | 733 (57%) |
| Other                   |        | 6,227 (18%)                     | 1,257 (18%)      | 1,570 (30%)      | 267 (21%) |

Data are means (SD) or number (%).The numbers are calculated on patients with available data. BUN, blood urea nitrogen; LVEF, left ventricular ejection fraction; ISHLT, International Society for Heart and Lung Transplantation; IVC, internal validation cohort; NTTD, Nordic Thoracic Transplantation Database; TVC, temporal validation cohort.

**S1D Table. Blood group, immunology and era of the study population from ISHLT registry and the Nordic Thoracic Transplantation Database.**

|                        | N      | ISHLT                           |                  |                  | NTTD      |
|------------------------|--------|---------------------------------|------------------|------------------|-----------|
|                        |        | Derivation cohort<br>N = 41,780 | IVC<br>N = 8,569 | TVC<br>N = 6,276 | N = 1,285 |
| Recipient blood group  | 57,910 |                                 |                  |                  |           |
| A                      |        | 18,304 (44%)                    | 3,752 (44%)      | 2,629 (42%)      | 618 (48%) |
| AB                     |        | 2,737 (7%)                      | 539 (6%)         | 500 (8%)         | 72 (6%)   |
| B                      |        | 5,300 (13%)                     | 1,051 (12%)      | 859 (14%)        | 158 (12%) |
| O                      |        | 15,439 (37%)                    | 3,227 (38%)      | 2,288 (36%)      | 437 (34%) |
| Donor blood group      | 57,910 |                                 |                  |                  |           |
| A                      |        | 16,802 (40%)                    | 3,446 (40%)      | 2,315 (37%)      | 544 (42%) |
| AB                     |        | 1,266 (3%)                      | 257 (3%)         | 312 (5%)         | 20 (2%)   |
| B                      |        | 4,226 (10%)                     | 806 (9%)         | 675 (11%)        | 132 (10%) |
| O                      |        | 19,486 (47%)                    | 4,060 (47%)      | 2,974 (47%)      | 589 (46%) |
| HLA-A mismatch         | 25,473 |                                 |                  |                  |           |
| 0                      |        | 735 (4%)                        | 157 (4%)         | 111 (4%)         | 744 (%)   |
| 1                      |        | 7,438 (41%)                     | 1,514 (41%)      | 1,196 (40%)      | 339 (51%) |
| 2                      |        | 9,948 (55%)                     | 2,044 (55%)      | 1,665 (56%)      | 282 (42%) |
| HLA-B mismatch         | 28,416 |                                 |                  |                  |           |
| 0                      |        | 285 (1%)                        | 55 (1%)          | 51 (2%)          | 9 (1%)    |
| 1                      |        | 5,304 (26%)                     | 1,085 (26%)      | 821 (24%)        | 214 (34%) |
| 2                      |        | 1,4663 (72%)                    | 3,010 (73%)      | 2,510 (74%)      | 409 (65%) |
| HLA-DR mismatch        | 25,385 |                                 |                  |                  |           |
| 0                      |        | 720 (4%)                        | 163 (4%)         | 142 (5%)         | 19 (3%)   |
| 1                      |        | 7,324 (41%)                     | 1,496 (40%)      | 1,169 (40%)      | 339 (46%) |
| 2                      |        | 9,934 (55%)                     | 2,060 (55%)      | 1,646 (56%)      | 373 (51%) |
| Era of transplantation | 57,910 |                                 |                  |                  |           |
| 1991-1995              |        | 6,029 (14%)                     | 1,259 (15%)      |                  |           |
| 1996-2000              |        | 14,804 (35%)                    | 2,949 (34%)      |                  | 450 (35%) |
| 2001-2005              |        | 13,078 (31%)                    | 2,682 (31%)      |                  | 451 (35%) |
| 2006-2010              |        | 7,869 (19%)                     | 1,679 (20%)      | 6,276 (100%)     | 384 (30%) |

Data are means (SD) or number (%). The numbers are calculated on patients with available data. HLA, human leukocyte antigen; ISHLT, International Society for Heart and Lung Transplantation; IVC, internal validation cohort; NTTD, Nordic Thoracic Transplantation Database; TVC, temporal validation cohort.
