# Supplementary material for: The International Heart Transplant Survival Algorithm (IHTSA): A New Model to Improve Organ Sharing and Survival
Source: PubMed Central journal article supplement (PMC4356583; doi:10.1371/journal.pone.0118644), 2015-03-11
Supplement: pone.0118644.s004.pdf [file pone.0118644.s004.pdf]

**S3A Table. Influences of the allocated organs, and the predicted and observed survival time depending on the waiting list size, using the IHTSA model, Clinical model respectively by random tested on the internal validation cohort (IVC).**

| Allocated organs<br>N (%) |            |            |                      | Predicted median survival<br>time<br>(months) |          |                      | Observed median survival<br>time<br>(months) |          |                      |
|---------------------------|------------|------------|----------------------|-----------------------------------------------|----------|----------------------|----------------------------------------------|----------|----------------------|
| N                         | IHTSA      | Clinical   | p Value <sup>†</sup> | IHTSA                                         | Clinical | p Value <sup>‡</sup> | IHTSA                                        | Clinical | p Value <sup>§</sup> |
| 10                        | 3598 (84%) | 2842 (65%) | <0.001               | 164                                           | 158      | <0.001               | 145                                          | 136      | 0.089                |
| 30                        | 3913 (93%) | 3555 (82%) | <0.001               | 164                                           | 157      | <0.001               | 148                                          | 134      | 0.023                |
| 50                        | 4123 (94%) | 3623 (86%) | <0.001               | 164                                           | 157      | <0.001               | 145                                          | 142      | 0.104                |
| 100                       | 4103 (97%) | 3861 (91%) | <0.001               | 165                                           | 156      | <0.001               | 148                                          | 133      | 0.004                |
| 200                       | 4281 (98%) | 4107 (95%) | <0.001               | 166                                           | 157      | <0.001               | 151                                          | 143      | 0.030                |

  

| N   | IHTSA      | Random     | p Value <sup>†</sup> | IHTSA | Random | p Value <sup>‡</sup> | IHTSA | Random | p Value <sup>§</sup> |
|-----|------------|------------|----------------------|-------|--------|----------------------|-------|--------|----------------------|
| 10  | 3598 (84%) | 3661 (85%) | 0.317                | 164   | 136    | <0.001               | 145   | 128    | <0.001               |
| 30  | 3913 (93%) | 4008 (92%) | 0.591                | 164   | 133    | <0.001               | 148   | 122    | <0.001               |
| 50  | 4123 (94%) | 3929 (94%) | 0.535                | 164   | 129    | <0.001               | 145   | 122    | <0.001               |
| 100 | 4103 (97%) | 4178 (97%) | 0.790                | 165   | 126    | <0.001               | 148   | 122    | <0.001               |
| 200 | 4281 (98%) | 4102 (98%) | 0.886                | 166   | 127    | <0.001               | 151   | 118    | <0.001               |

Data are number (%) or median survival time. <sup>†</sup> $\chi^2$  test, <sup>‡</sup>Mann-Whitney test and <sup>§</sup>log-rank test.

**S3B Table. Influences of the allocated organs, and the predicted and observed survival time depending on waiting list size, using the IHTSA model, Clinical model respectively by random applied on the external validation cohort (Nordic Thoracic transplantation Database).**

| Allocated organs<br>N (%) |           |           |                      | Predicted median survival<br>time<br>(months) |          |                      | Observed median survival<br>time<br>(months) |          |                      |
|---------------------------|-----------|-----------|----------------------|-----------------------------------------------|----------|----------------------|----------------------------------------------|----------|----------------------|
| N                         | IHTSA     | Clinical  | p Value <sup>†</sup> | IHTSA                                         | Clinical | p Value <sup>‡</sup> | IHTSA                                        | Clinical | p Value <sup>§</sup> |
| 10                        | 571 (88%) | 427 (66%) | <0.001               | 167                                           | 165      | 0.020                | 160                                          | 135      | 0.679                |
| 30                        | 590 (95%) | 535 (82%) | <0.001               | 169                                           | 163      | <0.001               | 159                                          | 144      | 0.182                |
| 50                        | 622 (97%) | 531 (85%) | <0.001               | 173                                           | 165      | <0.001               | 159                                          | 149      | 0.671                |
| 100                       | 595 (97%) | 598 (93%) | 0.001                | 172                                           | 163      | <0.001               | 159                                          | 157      | 0.562                |
| 200                       | 619 (96%) | 620 (93%) | 0.013                | 174                                           | 160      | <0.001               | 160                                          | 149      | 0.381                |

  

| N   | IHTSA     | Random    | p Value <sup>†</sup> | IHTSA | Random | p Value <sup>‡</sup> | IHTSA | Random | p Value <sup>§</sup> |
|-----|-----------|-----------|----------------------|-------|--------|----------------------|-------|--------|----------------------|
| 10  | 571 (88%) | 574 (90%) | 0.277                | 167   | 142    | <0.001               | 160   | 141    | 0.091                |
| 30  | 590 (95%) | 631 (96%) | 0.476                | 169   | 140    | <0.001               | 159   | 144    | 0.100                |
| 50  | 622 (97%) | 627 (97%) | 0.760                | 173   | 139    | <0.001               | 159   | 141    | 0.016                |
| 100 | 595 (97%) | 650 (97%) | 0.971                | 172   | 136    | <0.001               | 159   | 138    | 0.011                |
| 200 | 619 (96%) | 611 (95%) | 0.160                | 174   | 139    | <0.001               | 160   | 143    | 0.063                |

Data are number (%) or median survival time. <sup>†</sup> $\chi^2$  test, <sup>‡</sup>Mann-Whitney test and <sup>§</sup>log-rank test.
